# Supplementary material for: Short-Wavelength and Near-Infrared Autofluorescence in Patients with Deficiencies of the Visual Cycle and Phototransduction
Source: PubMed Central journal article supplement (PMC7265524; doi:10.1038/s41598-020-65763-x), 2020-06-02
Supplement: 41598_2020_65763_MOESM1_ESM.pdf [file 41598_2020_65763_MOESM1_ESM.pdf]

## **Short-Wavelength and Near-Infrared Autofluorescence in Patients with Deficiencies of the Visual Cycle and Phototransduction**

Jin Kyun Oh<sup>1,2</sup>, Jose Ronaldo Lima de Carvalho Jr<sup>1,3,4</sup>, Joseph Ryu<sup>1</sup>, Stephen H. Tsang<sup>1,5</sup>, Janet R. Sparrow<sup>1,5</sup>§.

<sup>1</sup>Department of Ophthalmology, Columbia University Medical Center, New York, NY, USA

<sup>2</sup>State University of New York at Downstate Medical Center, Brooklyn, NY, USA

<sup>3</sup>Department of Ophthalmology, Empresa Brasileira de Servicos Hospitalares (EBSERH) - Hospital das Clinicas de Pernambuco (HCPE), Federal University of Pernambuco (UFPE), Recife, Brazil

<sup>4</sup>Department of Ophthalmology, Federal University of São Paulo (UNIFESP), São Paulo, Brazil.

<sup>5</sup>Department of Pathology & Cell Biology, Columbia University Medical Center, New York, NY, USA

§ Corresponding author

### **Corresponding Author and Address for reprints:**

Janet R. Sparrow PhD

Harkness Eye Institute, Columbia University Medical Center

630 West 168th Street, New York, NY 10032

Phone: (212) 305-9944 / Email: [jrs88@cumc.columbia.edu](mailto:jrs88@cumc.columbia.edu)

**Supplemental Table 1. Demographics information of patients with visual cycle-gene and phototransduction-gene associated retinal dystrophy**

| <b>Patient ID/<br/>Gender</b> | <b>Age at diagnosis<br/>(years)</b> | <b>Age at imaging<br/>(years)</b> | <b>Gene and variants</b>                                                   | <b>BCVA</b>       | <b>Ethnicity</b> | <b>Ring on SW-AF</b> | <b>Ring on NIR-AF</b> | <b>Retinal Findings</b>                |
|-------------------------------|-------------------------------------|-----------------------------------|----------------------------------------------------------------------------|-------------------|------------------|----------------------|-----------------------|----------------------------------------|
| VC1/F                         | 5                                   | 22                                | <i>RPE65 (c.1205G&gt;A:p.Tr402Ter)<br/>(c.1022T&gt;C:p.Leu341Ser)</i>      | 20/400,<br>20/400 | Hispanic         | No                   | No                    | Minimal intraretinal pigment migration |
| VC2/F                         | 6                                   | 25                                | <i>RPE65 (c.1205G&gt;A:p.Tr402Ter)<br/>(c.1022T&gt;C:p.Leu341Ser)</i>      | 20/400,<br>20/250 | Hispanic         | No                   | No                    | Minimal intraretinal pigment migration |
| VC3/M                         | 4                                   | 23                                | <i>RPE65<br/>(c.65T&gt;C:p.Leu22Pro)<br/>(c.400_402delGTT:p.Val134del)</i> | 20/70,<br>20/70   | Brazilian        | No                   | No                    | Minimal intraretinal pigment migration |
| VC4/F                         | 0.5                                 | 9                                 | <i>RPE65 (p.Lys295Ter)<br/>(c.202C&gt;T:p.His68Tyr)</i>                    | 20/400,<br>20/150 | Caucasian        | No                   | No                    | RPE Mottling                           |
| VC5/M                         | 13                                  | 13                                | <i>RDH11<br/>(c.199C&gt;T:p.Arg67Ter)<br/>(c.322C&gt;T:p.Arg108Ter)</i>    | 20/40,<br>20/40   | Caucasian        | No                   | No                    | Mottled macula                         |
| VC6/F                         | 15                                  | 15                                | <i>RDH11<br/>(c.199C&gt;T:p.Arg67*)<br/>(c.322C&gt;T:p.Arg108*)</i>        | 20/40,<br>20/40   | Caucasian        | No                   | X                     | Mottled Macula                         |
| VC7/F                         | 15                                  | 14                                | <i>RDH5<br/>(c.160C&gt;T:p.Arg54Ter)<br/>(c.572G&gt;A:p.Arg191Gln)</i>     | 20/30,<br>20/30   | Hispanic         | No                   | No                    | Fine subretinal dots                   |

|        |      |    |                                                                                  |                   |           |     |     |                                            |
|--------|------|----|----------------------------------------------------------------------------------|-------------------|-----------|-----|-----|--------------------------------------------|
| VC8/F  | 12.5 | 15 | <i>RLBP1</i><br>(c.286_297del:p.Phe96_Phe99)<br>(c.25C>T:p.Arg9Cys)              | 20/20,<br>20/20   | Caucasian | Yes | No  | RPE<br>mottling                            |
| VC9/F  | 11.5 | 13 | <i>RLBP1</i><br>(c.286_297del:p.Phe96_Phe99)<br>(c.25C>T:p.Arg9Cys)              | 20/20,<br>20/30   | Caucasian | Yes | No  | RPE<br>mottling                            |
| VC10/F | 4    | 27 | <i>LRAT</i><br>(c.459dupC:p.Tyr154LeufsX30<br>(Whole gene deletion of exons 1-3) | 20/CF,<br>20/CF   | Caucasian | No  | No  | RPE<br>mottling                            |
| PT1/F  | 14   | 16 | <i>RHO</i> (c.937-27_-<br>19delCCCTGATCTC)                                       | 20/20,<br>20/20   | Caucasian | Yes | Yes | Intraretinal<br>pigment<br>migration       |
| PT2/M  | 21   | 26 | <i>PRPF8</i><br>(c.4022+15A>G)                                                   | 20/20,<br>20/20   | Caucasian | Yes | Yes | Intraretinal<br>pigment<br>migration       |
| PT3/F  | 17   | 17 | <i>PRPF31</i><br>(c.383T>A:p.Leu128Ter)                                          | 20/40,<br>20/25   | Caucasian | Yes | Yes | No<br>Intraretinal<br>pigment<br>migration |
| PT4/M  | 14   | 14 | <i>PDE6A</i><br>(c.1705C>A:p.Gln569Lys)<br>(c.2263C>T:p.Gln755Ter)               | 20/30,<br>20/30   | Caucasian | Yes | Yes | Intraretinal<br>pigment<br>migration       |
| PT5/F  | 23   | 28 | <i>RHO</i><br>c.50C>T (p.Thr17Met)                                               | 20/20<br>20/20    | Caucasian | Yes | Yes | Intraretinal<br>pigment<br>migration       |
| PT6/M  | 16   | 17 | <i>CNGB1</i><br>(c.3150delG: pPhe1051Leufs*12)<br>(c.3150delG: pPhe1051Leufs*12) | 20/25,<br>20/20   | Hispanic  | Yes | Yes | No<br>Intraretinal<br>pigment<br>migration |
| PT7/F  | 19   | 28 | <i>GUC1A1</i><br>(c.296A>G:p.Tyr99Cys)                                           | 20/100,<br>20/100 | Asian     | Yes | Yes | No<br>Intraretinal                         |

|               |           |           |                                                                                |                               |                         |            |            |                                          |
|---------------|-----------|-----------|--------------------------------------------------------------------------------|-------------------------------|-------------------------|------------|------------|------------------------------------------|
|               |           |           |                                                                                |                               |                         |            |            | <b>pigment migration</b>                 |
| <b>PT8/F</b>  | <b>15</b> | <b>23</b> | <b><i>GUCY2D</i></b><br><b>(c.3220C&gt;T:p.Pro1074Ser)</b>                     | <b>20/20,</b><br><b>20/20</b> | <b>African American</b> | <b>No</b>  | <b>No</b>  | <b>Intraretinal pigment migration</b>    |
| <b>PT9/M</b>  | <b>12</b> | <b>26</b> | <b><i>TULP1</i></b> (c.349G>A:p.Glu117Lys)<br><b>(c.349G&gt;A:p.Glu117Lys)</b> | <b>20/80,</b><br><b>20/50</b> | <b>Asian</b>            | <b>No</b>  | <b>No</b>  | <b>Intraretinal pigment migration</b>    |
| <b>PT10/M</b> | <b>14</b> | <b>16</b> | <b><i>GUCY2D</i></b><br><b>(c.2512C&gt;T:p.Arg838Cys)</b>                      | <b>20/20,</b><br><b>20/30</b> | <b>Caucasian</b>        | <b>Yes</b> | <b>Yes</b> | <b>No Intraretinal Pigment Migration</b> |
| <b>PT11/F</b> | <b>15</b> | <b>15</b> | <b><i>PRPF31</i></b> (c.856-2A>G)                                              | <b>20/20,</b><br><b>20/40</b> | <b>Caucasian</b>        | <b>Yes</b> | <b>Yes</b> | <b>No Intraretinal Pigment Migration</b> |
| <b>PT12/M</b> | <b>26</b> | <b>27</b> | <b><i>PRPF31</i></b> (c.73G>T:p.Glu25Ter)                                      | <b>20/20,</b><br><b>20/25</b> | <b>Caucasian</b>        | <b>Yes</b> | <b>Yes</b> | <b>Intraretinal pigment migration</b>    |
| <b>PT13/M</b> | <b>25</b> | <b>31</b> | <b><i>PRPF31</i></b><br><b>(c.322+4_322+7delAGTG)</b>                          | <b>20/80,</b><br><b>20/25</b> | <b>Hispanic</b>         | <b>Yes</b> | <b>Yes</b> | <b>Intraretinal pigment migration</b>    |
| <b>PT14/F</b> | <b>56</b> | <b>56</b> | <b><i>RHO</i></b><br><b>(c.68C&gt;A:p.Pro23His)</b>                            | <b>20/40,</b><br><b>20/40</b> | <b>Caucasian</b>        | <b>Yes</b> | <b>Yes</b> | <b>Intraretinal Pigment Migration</b>    |
| <b>PT15/F</b> | <b>34</b> | <b>34</b> | <b><i>RHO</i></b><br><b>(c.1040C&gt;T:p.Pro347Leu)</b>                         | <b>N/A</b>                    | <b>Caucasian</b>        | <b>Yes</b> | <b>Yes</b> | <b>Intraretinal Pigment Migration</b>    |
| <b>PT16/M</b> | <b>61</b> | <b>61</b> | <b><i>RHO</i></b><br><b>(c.68C&gt;A:p.Pro23His)</b>                            | <b>N/A</b>                    | <b>Caucasian</b>        | <b>Yes</b> | <b>Yes</b> | <b>Intraretinal Pigment Migration</b>    |

|               |           |           |                                                                                                                                                                       |                               |                  |            |            |                                                           |
|---------------|-----------|-----------|-----------------------------------------------------------------------------------------------------------------------------------------------------------------------|-------------------------------|------------------|------------|------------|-----------------------------------------------------------|
| <b>PT17/M</b> | <b>13</b> | <b>16</b> | <b><i>PDE6B</i></b><br><b>(<i>c.1923_1969ins6del47:p.</i></b><br><b><i>Tyr641TfsX31</i>)</b><br><b>(<i>c.1923_1969ins6del47:p.</i></b><br><b><i>Tyr641TfsX31</i>)</b> | <b>20/25,</b><br><b>20/25</b> | <b>Caucasian</b> | <b>Yes</b> | <b>Yes</b> | <b>Intraretinal</b><br><b>Pigment</b><br><b>Migration</b> |
| <b>PT18/F</b> | <b>46</b> | <b>51</b> | <b><i>PDE6A</i></b><br><b>(<i>c.1250A&gt;G:p.Glu417Gly</i>)</b><br><b>(<i>c.1250A&gt;G:p.Glu417Gly</i>)</b>                                                           | <b>20/60,</b><br><b>20/70</b> | <b>Hispanic</b>  | <b>Yes</b> | <b>Yes</b> | <b>Intraretinal</b><br><b>Pigment</b><br><b>Migration</b> |
| <b>PT19/F</b> | <b>27</b> | <b>36</b> | <b><i>CNGB1</i></b><br><b>(<i>c.3150delG:p.Phe1051Leufs*12</i>)</b><br><b>(<i>c.1941C&gt;A:p.647Arg</i>)</b>                                                          | <b>20/20,</b><br><b>20/25</b> | <b>Brazilian</b> | <b>Yes</b> | <b>Yes</b> | <b>Intraretinal</b><br><b>Pigment</b><br><b>Migration</b> |

VC – patients carrying mutations in visual cycle genes, PT – patients carrying mutations in phototransduction genes, BCVA – best corrected visual acuity, SW-AF – short-wavelength autofluorescence, NIR-AF – near-infrared autofluorescence

**Supplemental Table 2. Sensitivities for Short-Wavelength and Near-Infrared Autofluorescence Imaging Acquisition**

| <b>Patient ID</b> | <b>SW-AF</b> | <b>NIR-AF</b>        |
|-------------------|--------------|----------------------|
| <b>VC1</b>        | <b>100</b>   | <b>96 (HRA+OCT)</b>  |
| <b>VC2</b>        | <b>104</b>   | <b>96 (HRA+OCT)</b>  |
| <b>VC3</b>        | <b>106</b>   | <b>96 (HRA2)</b>     |
| <b>VC4</b>        | <b>107</b>   | <b>x</b>             |
| <b>VC5</b>        | <b>102</b>   | <b>98 (HRA+OCT)</b>  |
| <b>VC6</b>        | <b>100</b>   | <b>x</b>             |
| <b>VC7</b>        | <b>103</b>   | <b>96 (HRA2)</b>     |
| <b>VC8</b>        | <b>107</b>   | <b>96 (HRA2)</b>     |
| <b>VC9</b>        | <b>107</b>   | <b>96 (HRA2)</b>     |
| <b>VC10</b>       | <b>102</b>   | <b>96 (HRA2)</b>     |
| <b>PT1</b>        | <b>89</b>    | <b>96 (HRA2)</b>     |
| <b>PT2</b>        | <b>74</b>    | <b>x</b>             |
| <b>PT3</b>        | <b>78</b>    | <b>96 (HRA+OCT)</b>  |
| <b>PT4</b>        | <b>87</b>    | <b>96 (HRA2)</b>     |
| <b>PT5</b>        | <b>89</b>    | <b>97 (HRA+OCT)</b>  |
| <b>PT6</b>        | <b>69</b>    | <b>96 (HRA+OCT)</b>  |
| <b>PT7</b>        | <b>90</b>    | <b>96 (HRA2)</b>     |
| <b>PT8</b>        | <b>91</b>    | <b>96 (HRA2)</b>     |
| <b>PT9</b>        | <b>78</b>    | <b>96 (HRA2)</b>     |
| <b>PT10</b>       | <b>91</b>    | <b>96 (HRA2)</b>     |
| <b>PT11</b>       | <b>85</b>    | <b>x</b>             |
| <b>PT12</b>       | <b>94</b>    | <b>96 (HRA2)</b>     |
| <b>PT13</b>       | <b>96</b>    | <b>96 (HRA2)</b>     |
| <b>PT14</b>       | <b>92</b>    | <b>x</b>             |
| <b>PT15</b>       | <b>94</b>    | <b>96 (HRA2)</b>     |
| <b>PT16</b>       | <b>88</b>    | <b>96 (HRA2)</b>     |
| <b>PT17</b>       | <b>82</b>    | <b>x</b>             |
| <b>PT18</b>       | <b>88</b>    | <b>96 (HRA2)</b>     |
| <b>PT19</b>       | <b>76</b>    | <b>107 (HRA+OCT)</b> |

VC – patients carrying mutations in visual cycle genes, PT – patients carrying mutations in phototransduction genes, SW-AF – short-wavelength autofluorescence, NIR-AF – near-infrared autofluorescence

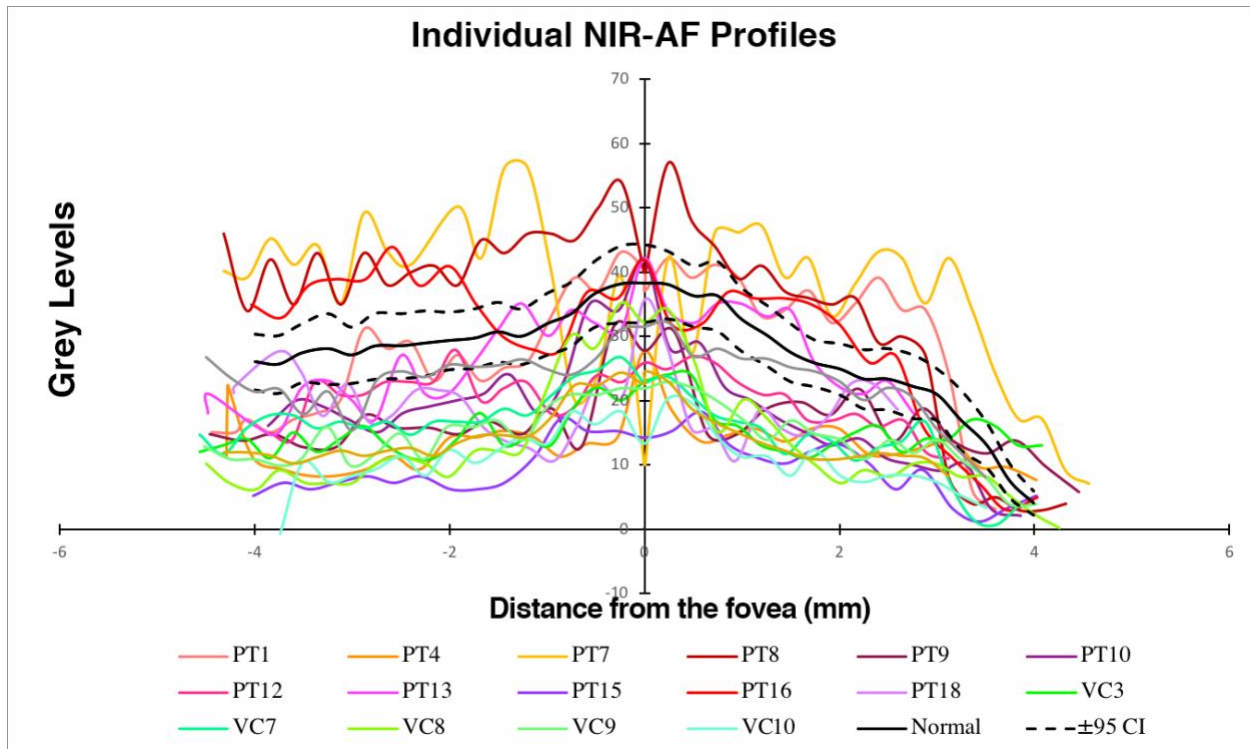

**Supplemental Figure 1.** Semi-quantitative analysis of near-infrared fundus autofluorescence (qNIR-AF). Profiles are plotted for individual patients carrying mutations in phototransduction (PT) and visual cycle (VC) genes. Graphs of the semiquantitative analysis of each individual patient suggesting the common feature of normal near-infrared autofluorescence in all patients with mutations in phototransduction genes and hypoautofluorescence in patients with mutations in visual cycle genes.
